# Supplementary material for: Differences in neurochemical profiles of two gadid species under ocean warming and acidification
Source: PubMed Central journal article supplement (PMC5661927; doi:10.1186/s12983-017-0238-5), 2017-10-30

## Energy metabolism

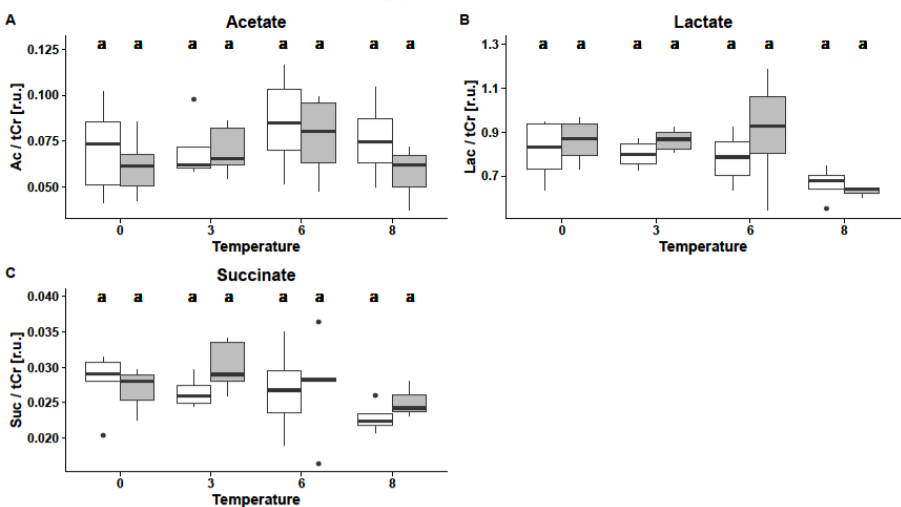

## GABA metabolism

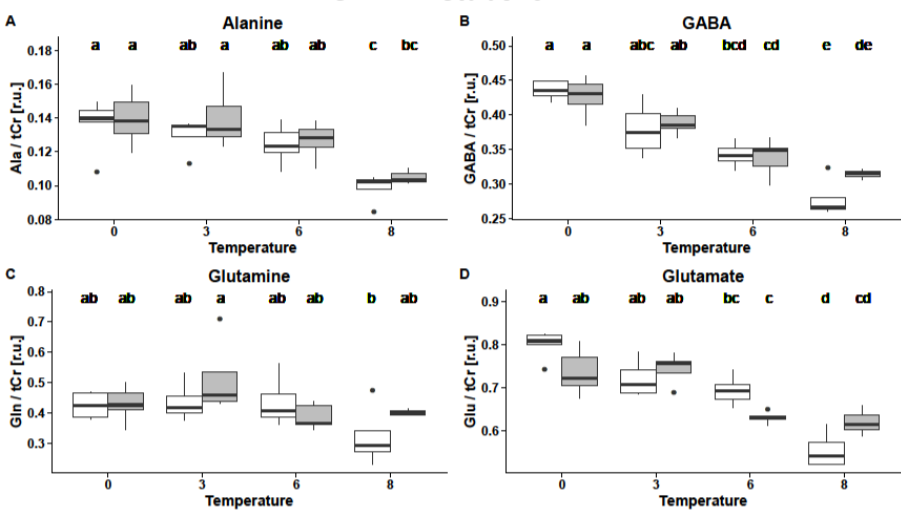

## Membrane components

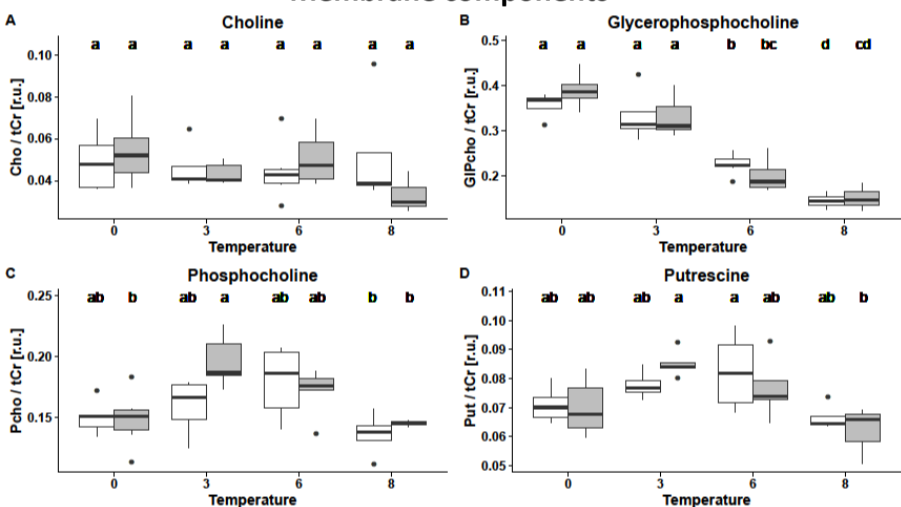

## Osmolytes

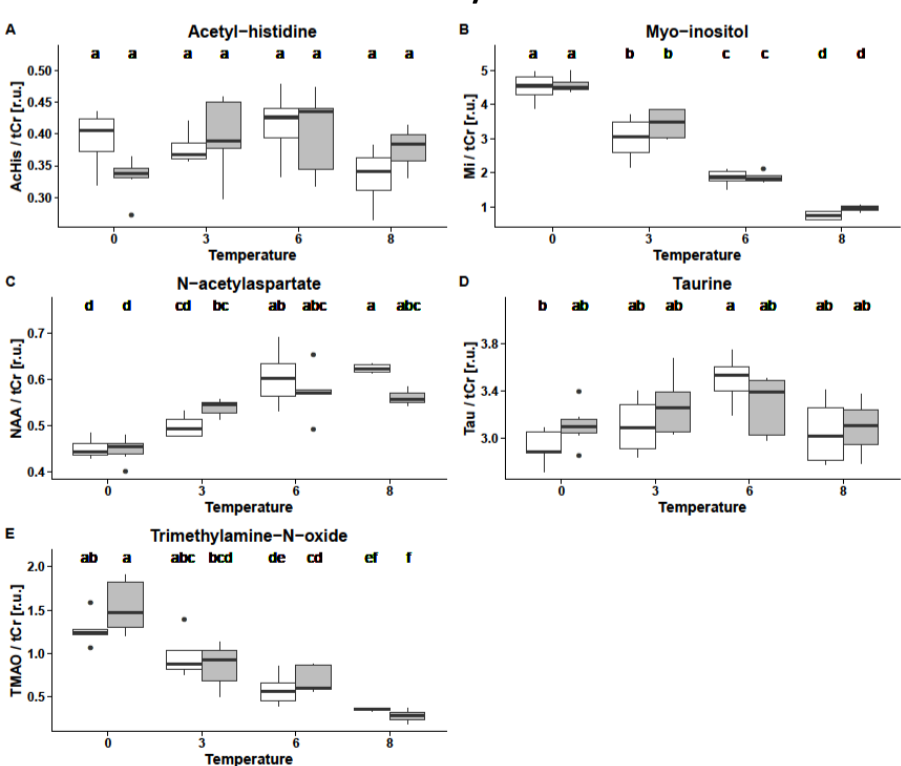

## Other

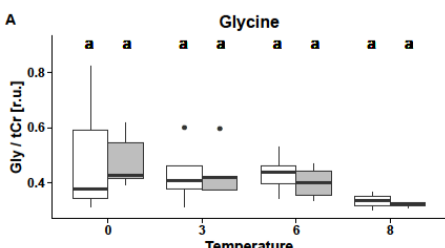

Supplement: 12983_2017_238_MOESM4_ESM.pdf [file 12983_2017_238_MOESM4_ESM.pdf]
